# Supplementary material
Source: PubMed Central journal article supplement (PMC2546559)

## Supplement figure

**Figure S1.** The sodium iodate (NaIO<sub>3</sub>)-induced RPE death model (27) mimics the retinal degeneration observed in *Rdh8<sup>-/-</sup>Abca4<sup>-/-</sup>* mice. **A.** Representative retinal structure assessed in an 8-week-old C57BL/6 mouse 1 week after NaIO<sub>3</sub> injection. NaIO<sub>3</sub> (100 µl of 1% in PBS) was injected intravenously into mice under deep anesthesia. Punctuate retinal degeneration with retinal rosette formation is evident. Bars indicate 10 µm. **B.** Bright field cryo-section image showing damaged RPE 1 week after NaIO<sub>3</sub> injection. Bar indicates 10 µm. **C.** Fluorescent angiography with FITC-conjugated high molecular weight dextran reveals choroidal neovascularization growth (white arrows) 3 months after NaIO<sub>3</sub> injection. Bar indicates 10 µm. **D.** A retinal fold is shown 1 week after NaIO<sub>3</sub> injection. Bar indicates 10 µm. **E.** A similar retinal fold is seen in bright light-exposed (10,000 lux for 60 min) 4-week-old *Rdh8<sup>-/-</sup>Abca4<sup>-/-</sup>* mice. Bar indicates 10 µm. RPE, retinal pigmented epithelium; ONL, inner nuclear layer; INL, inner nuclear layer; INL; inner nuclear layer, IPL; inner plexiform layer, GCL; ganglion cell layer.

Fig S1

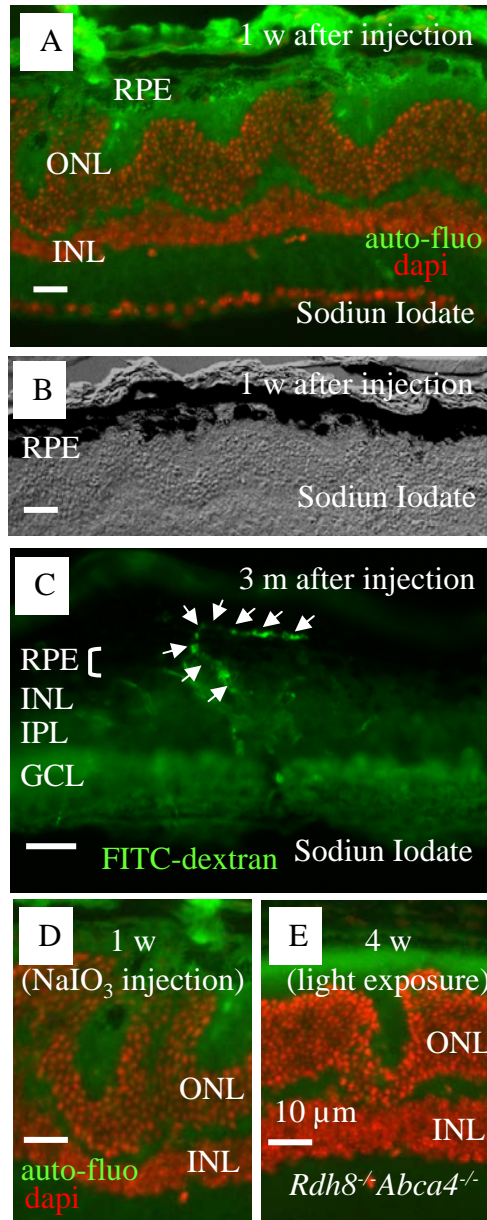

Supplement: M804505200_1.pdf [file M804505200_1.pdf]
